# Supplementary material for: Single-cell evaluation of red blood cell bio-mechanical and nano-structural alterations upon chemically induced oxidative stress
Source: PubMed Central journal article supplement (PMC4423428; doi:10.1038/srep09768), 2015-05-07
Supplement: srep09768-s1.pdf [file srep09768-s1.pdf]

# **Single-cell evaluation of red blood cell bio-mechanical and nano-structural alterations upon chemically induced oxidative stress**

Ameya Sinha<sup>¥#¶</sup>, Trang TT Chu<sup>¥¶</sup>, Ming Dao<sup>#†\*</sup> and Rajesh Chandramohanadas<sup>¥\*</sup>

Table S1. Statistics related to the micropipette analyses.

Fig. S2. RBCs treated with higher H<sub>2</sub>O<sub>2</sub> concentrations resulted in increased deformability. Data is represented as median ± range.

Table S3. Statistical assessment of the AFM images to estimate spectrin length.

# Supplemental: S1

Table S1.

Statistical assessment of the Micropipette data: Deformability

| <b>H<sub>2</sub>O<sub>2</sub></b> | <b>Control</b>           | <b>0.3mM</b> | <b>1mM</b>   | <b>3mM</b> |
|-----------------------------------|--------------------------|--------------|--------------|------------|
|                                   | Mean ( $\mu\text{N/m}$ ) | 8.888        | 7.515        | 6.613      |
| Standard Deviation                | 1.702                    | 1.73         | 1.336        | 0.8793     |
| Standard Error of Mean            | 0.3805                   | 0.3868       | 0.2987       | 0.1966     |
| <b>Diamide</b>                    |                          |              |              |            |
| <b>Diamide</b>                    | <b>Control</b>           | <b>0.3mM</b> | <b>1mM</b>   | <b>3mM</b> |
|                                   | Mean ( $\mu\text{N/m}$ ) | 7.107        | 9.615        | 11.83      |
| Standard Deviation                | 1.76                     | 1.319        | 2.847        | 5.045      |
| Standard Error of Mean            | 0.4546                   | 0.3406       | 0.7352       | 1.303      |
| <b>Primaquine</b>                 |                          |              |              |            |
| <b>Primaquine</b>                 | <b>Control</b>           | <b>0.3mM</b> | <b>1mM</b>   | <b>3mM</b> |
|                                   | Mean ( $\mu\text{N/m}$ ) | 4.19         | 5.266        | 6.503      |
| Standard Deviation                | 0.5098                   | 1.662        | 1.688        | 3.579      |
| Standard Error of Mean            | 0.114                    | 0.3717       | 0.3774       | 0.8003     |
| <b>CumOOH</b>                     |                          |              |              |            |
| <b>CumOOH</b>                     | <b>Control</b>           | <b>0.1mM</b> | <b>0.3mM</b> | <b>1mM</b> |
|                                   | Mean ( $\mu\text{N/m}$ ) | 5.779        | 6.949        | 13.2       |
| Standard Deviation                | 1.375                    | 1.712        | 4.623        | -          |
| Standard Error of Mean            | 0.355                    | 0.442        | 1.194        | -          |

| <b>H<sub>2</sub>O<sub>2</sub></b> | <b>Control</b>           | <b>3mM</b> | <b>10mM</b> | <b>30mM</b> |
|-----------------------------------|--------------------------|------------|-------------|-------------|
|                                   | Mean ( $\mu\text{N/m}$ ) | 7.522      | 4.961       | 3.722       |
| Standard Deviation                | 2.199                    | 2.095      | 1.396       | 0.8685      |
| Standard Error of Mean            | 0.5678                   | 0.5409     | 0.3605      | 0.2242      |

# Supplemental: S2

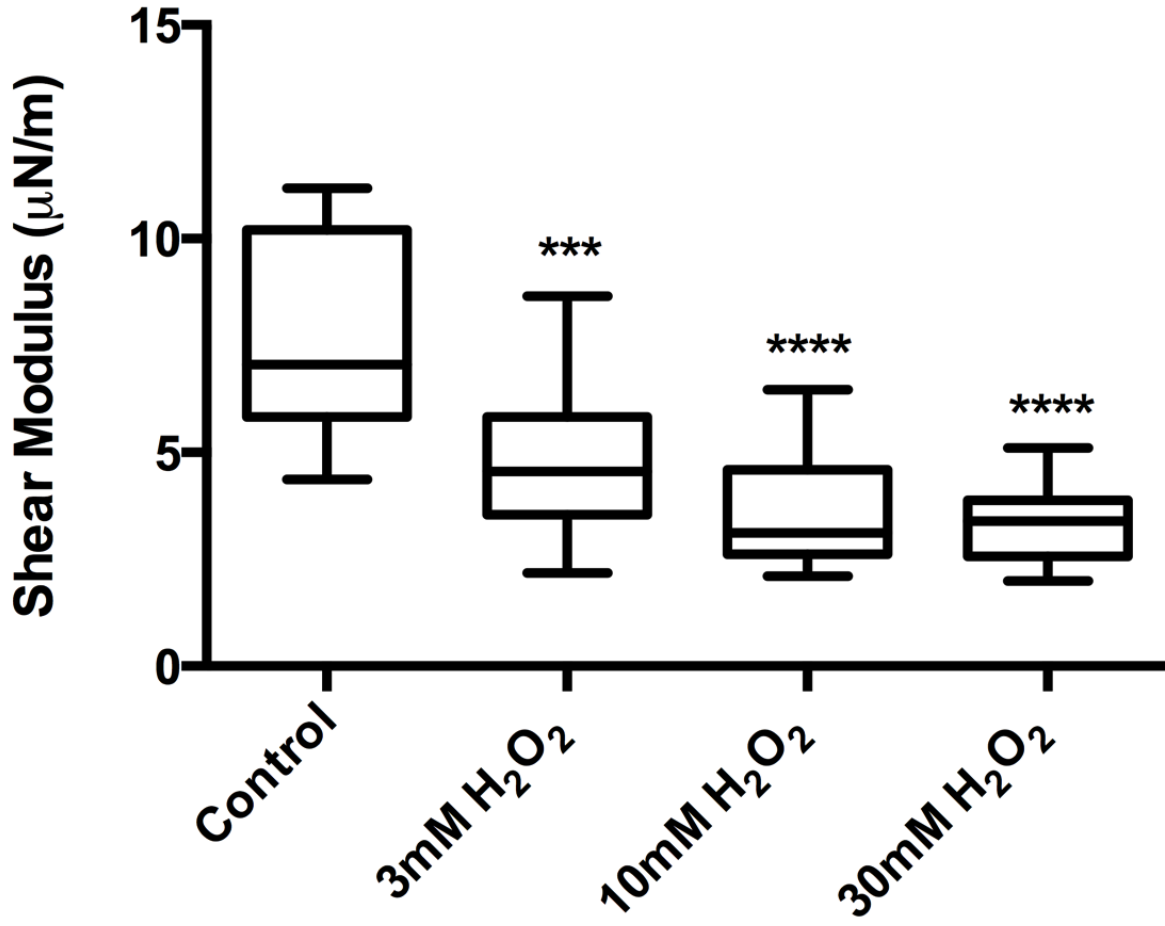

# Supplemental: S3

Table S3.

Statistical assessment of the AFM data: spectrin length

|                              | <b>Control</b> | <b>H<sub>2</sub>O<sub>2</sub></b> | <b>Diamide</b> | <b>Primaquine</b> |
|------------------------------|----------------|-----------------------------------|----------------|-------------------|
| <b>Mean (nm)</b>             | 34.5           | 32                                | 22.7           | 23.2              |
| <b>Standard Deviation</b>    | 4.47           | 3.86                              | 3.41           | 3.48              |
| <b>Standar Error of Mean</b> | 0.4682         | 0.3856                            | 0.3378         | 0.3727            |
| <b>Number of values</b>      | 91             | 100                               | 102            | 87                |
